# Supplementary material for: Relationship between obesity and lower rates of breast feeding initiation in regional Victoria, Australia: an 8-year retrospective panel study
Source: HighWire-hosted journal article supplement (doi:10.1136/bmjopen-2020-044884), 2021-02-01
Supplement: bmjopen-2020-044884supp001_data_supplement.pdf [file bmjopen-2020-044884supp001_data_supplement.pdf]

## Relationship between obesity and lower rates of breastfeeding initiation in regional Victoria, Australia: an 8-year retrospective panel study

Melanie Bish, Fiona Faulks, Lisa H Amir, David H McIntyre, Rachel R Huxley, Rachel James, George Mnatzaganian

### Supplementary tables

**Supplementary Table 1: Not breastfeeding during hospital stay by BMI category, year of birth, and type of birth: % per birth**

|                      | N        | All  | BMI<br>< 18.5 | BMI<br>18.5 – 24.9 | BMI<br>25.0 – 29.9 | BMI<br>30.0 – 34.9 | BMI<br>35.0 – 39.0 | BMI<br>40.0 + | P value |
|----------------------|----------|------|---------------|--------------------|--------------------|--------------------|--------------------|---------------|---------|
| <b>Year of birth</b> |          |      |               |                    |                    |                    |                    |               |         |
| 2010                 | N=1,136  | 18.3 | 28.1          | 12.5               | 18.5               | 19.8               | 26.8               | 40.7          | <0.001  |
| 2011                 | N=1,192  | 16.4 | 18.9          | 12.1               | 18.2               | 22.7               | 17.6               | 23.1          | 0.010   |
| 2012                 | N=1,186  | 18.0 | (38.1)        | 15.3               | 16.6               | 19.5               | 27.7               | 20.7          | 0.013   |
| 2013                 | N=1,300  | 14.8 | (25.9)        | 11.7               | 10.8               | 20.9               | 18.5               | 26.2          | <0.001  |
| 2014                 | N=1,325  | 16.3 | (15.8)        | 12.5               | 12.7               | 23.7               | 22.6               | 28.8          | <0.001  |
| 2015                 | N=1,287  | 14.8 | (22.7)        | 12.0               | 13.3               | 16.1               | 21.1               | 25.0          | 0.009   |
| 2016                 | N=1,342  | 12.8 | (14.8)        | 9.6                | 10.7               | 18.6               | 16.4               | 21.4          | 0.001   |
| 2017                 | N=1,466  | 12.7 | (29.4)        | 9.2                | 11.2               | 14.6               | 18.9               | 21.9          | <0.001  |
| <b>Type of birth</b> |          |      |               |                    |                    |                    |                    |               |         |
| Unassisted vaginal   | N=5,706  | 14.2 | 26.8          | 11.2               | 12.0               | 19.5               | 19.4               | 23.7          | <0.001  |
| Assisted vaginal     | N=1,464  | 14.1 | 21.9          | 11.0               | 14.4               | 14.5               | 25.0               | 26.0          | 0.001   |
| Elective CS          | N=1,492  | 20.7 | (14.3)        | 17.9               | 17.3               | 23.6               | 27.8               | 25.6          | 0.014   |
| Emergency CS         | N=1,572  | 15.8 | (19.2)        | 10.7               | 15.7               | 18.7               | 16.2               | 28.7          | <0.001  |
| <b>All births</b>    | N=10,234 | 15.4 | 23.8          | 11.8               | 13.7               | 19.4               | 21.1               | 25.5          | <0.001  |

The proportions in brackets are based on 30 births or less  
Abbreviations: BMI, body mass index; CS, caesarean section

**Supplementary Table 2: Not breastfeeding during hospital stay by socioeconomic status and year of birth: % per birth**

|                      |          | RII 1 <sup>st</sup> quintile<br>(lowest SES) | RII 2 <sup>nd</sup> quintile | RII 3 <sup>rd</sup> quintile | RII 4 <sup>th</sup> quintile | RII 5 <sup>th</sup> quintile<br>(highest SES) | P value |
|----------------------|----------|----------------------------------------------|------------------------------|------------------------------|------------------------------|-----------------------------------------------|---------|
| <b>Year of birth</b> |          |                                              |                              |                              |                              |                                               |         |
| 2010                 | N=1,136  | 22.5                                         | 17.2                         | 17.1                         | 18.3                         | 12.7                                          | 0.038   |
| 2011                 | N=1,192  | 19.8                                         | 19.2                         | 18.2                         | 11.7                         | 11.1                                          | 0.016   |
| 2012                 | N=1,186  | 22.0                                         | 14.5                         | 17.4                         | 17.3                         | 13.3                                          | 0.062   |
| 2013                 | N=1,300  | 17.9                                         | 23.7                         | 11.1                         | 16.5                         | 10.1                                          | 0.002   |
| 2014                 | N=1,325  | 18.8                                         | 22.4                         | 16.3                         | 14.1                         | 12.4                                          | 0.103   |
| 2015                 | N=1,287  | 17.5                                         | 13.2                         | 13.8                         | 15.3                         | 10.8                                          | 0.190   |
| 2016                 | N=1,342  | 15.4                                         | 11.5                         | 11.6                         | 12.8                         | 10.9                                          | 0.382   |
| 2017                 | N=1,466  | 16.8                                         | 11.8                         | 12.2                         | 9.0                          | 9.4                                           | 0.011   |
| <b>All births</b>    | N=10,234 | 18.8                                         | 16.3                         | 14.6                         | 14.0                         | 11.3                                          | <0.001  |

Abbreviation: RII, relative index of inequality

**Supplementary Table 3:** Not breastfeeding during hospital stay: logistic regression using the Generalised Estimating Equations (GEE) approach

| Covariates                                                           | Univariate (unadjusted) |                  | Multivariable (adjusted) |         |
|----------------------------------------------------------------------|-------------------------|------------------|--------------------------|---------|
|                                                                      | OR (95% CI)             | P value          | OR (95% CI)              | P value |
| <b>Age categories (years)</b>                                        |                         |                  |                          |         |
| 20 – 34 (reference)                                                  | 1.00                    |                  | 1.00                     |         |
| ≤19                                                                  | 1.90 (1.53-2.36)        | <0.001           | 2.27 (1.78-2.89)         | <0.001  |
| 35 – 39                                                              | 0.94 (0.81-1.09)        | 0.443            | 0.82 (0.69-0.97)         | 0.021   |
| ≥40                                                                  | 0.83 (0.62-1.13)        | 0.243            | 0.69 (0.50-0.95)         | 0.024   |
| <b>Body mass index</b>                                               | <b>Kg/m<sup>2</sup></b> |                  |                          |         |
| Normal weight                                                        | 18.5 – 24.9 (reference) | 1.00             | 1.00                     |         |
| Underweight                                                          | <18.5                   | 1.73 (1.22-2.44) | 1.39 (0.97-1.99)         | 0.075   |
| Over-weight                                                          | 25.0 – 29.9             | 1.29 (1.12-1.48) | 1.32 (1.14-1.53)         | <0.001  |
| Obese class I                                                        | 30.0 – 34.9             | 1.71 (1.47-2.00) | 1.66 (1.40-1.96)         | <0.001  |
| Obese class II                                                       | 35.0 – 39.9             | 1.95 (1.60-2.38) | 1.85 (1.50-2.29)         | <0.001  |
| Obese class III                                                      | ≥40.0                   | 2.60 (2.10-3.22) | 2.61 (2.07-3.29)         | <0.001  |
| <b>Relative index of socioeconomic inequality</b>                    |                         |                  |                          |         |
| 5 <sup>th</sup> quintile (highest SES) (reference)                   | 1.00                    |                  | 1.00                     |         |
| 4 <sup>th</sup> quintile                                             | 1.22 (0.97-1.53)        | 0.089            | 1.03 (0.81-1.30)         | 0.815   |
| 3 <sup>rd</sup> quintile                                             | 1.23 (1.01-1.49)        | 0.037            | 1.08 (0.88-1.32)         | 0.457   |
| 2 <sup>nd</sup> quintile                                             | 1.40 (1.05-1.86)        | 0.023            | 0.99 (0.74-1.34)         | 0.958   |
| 1 <sup>st</sup> quintile (lowest SES)                                | 1.76 (1.47-2.10)        | <0.001           | 1.41 (1.17-1.69)         | <0.001  |
| <b>Born in Oceania</b>                                               | 2.14 (1.62-2.81)        | <0.001           | 1.46 (1.10-1.94)         | 0.010   |
| <b>Aboriginal Australian or Torres Strait Islander</b>               | 2.01 (1.64-2.47)        | <0.001           | 1.35 (1.09-1.68)         | 0.006   |
| <b>Past or current smoker</b>                                        | 2.64 (2.33-3.00)        | <0.001           | 2.00 (1.74-2.30)         | <0.001  |
| <b>Alcohol consumption (any quantity)</b>                            | 1.42 (1.04-1.94)        | 0.027            | 1.24 (0.89-1.72)         | 0.212   |
| <b>Pre-existing diabetes mellitus type 1 or 2</b>                    | 1.95 (1.19-3.21)        | 0.009            | 1.56 (0.92-2.64)         | 0.100   |
| <b>Pre-existing hypertension</b>                                     | 1.77 (1.24-2.54)        | 0.002            | 1.41 (0.96-2.06)         | 0.078   |
| <b>Other than hypertension and diabetes pre-existing comorbidity</b> | 1.14 (1.03-1.27)        | 0.015            | 1.00 (0.89-1.13)         | 0.933   |

|                                                            |                  |         |                  |        |
|------------------------------------------------------------|------------------|---------|------------------|--------|
| <b>Gravidity</b>                                           |                  |         |                  |        |
| 1 (reference)                                              | 1.00             |         | 1.00             |        |
| 2                                                          | 1.08 (0.95-1.23) | 0.233   | 0.93 (0.75-1.15) | 0.524  |
| 3                                                          | 1.51 (1.31-1.74) | < 0.001 | 1.24 (0.96-1.59) | 0.097  |
| 4 or more                                                  | 1.83 (1.59-2.11) | < 0.001 | 1.38 (1.06-1.80) | 0.015  |
| <b>Primiparous</b>                                         | 0.72 (0.65-0.79) | <0.001  | 0.74 (0.60-0.90) | 0.004  |
| <b>Induction of labour</b>                                 | 0.89 (0.79-0.99) | 0.035   | 0.97 (0.85-1.10) | 0.610  |
| <b>Type of birth</b>                                       |                  |         |                  |        |
| Unassisted vaginal (reference)                             | 1.00             |         | 1.00             |        |
| Assisted vaginal                                           | 1.01 (0.87-1.17) | 0.890   | 1.40 (1.18-1.67) | <0.001 |
| Elective caesarean section                                 | 1.55 (1.34-1.79) | <0.001  | 1.82 (1.51-2.21) | <0.001 |
| Emergency caesarean section                                | 1.22 (1.05-1.42) | 0.008   | 1.59 (1.31-1.93) | <0.001 |
| <b>Primary blood loss, ml</b>                              |                  |         |                  |        |
| Up to 500 (reference)                                      | 1.00             |         | 1.00             |        |
| 501 – 749                                                  | 1.05 (0.89-1.22) | 0.563   | 1.07 (0.90-1.27) | 0.456  |
| 750 – 999                                                  | 1.05 (0.86-1.29) | 0.644   | 1.08 (0.86-1.35) | 0.498  |
| 1000 or more                                               | 1.36 (1.05-1.75) | 0.018   | 1.44 (1.09-1.91) | 0.011  |
| <b>Mother's hospital length of stay (days), continuous</b> | 0.95 (0.91-0.99) | 0.035   | 0.82 (0.77-0.87) | <0.001 |
| <b>Infant's birth weight in grams</b>                      |                  |         |                  |        |
| 2500-3999 (reference)                                      | 1.00             |         | 1.00             |        |
| <2500                                                      | 2.28 (1.90-2.73) | <0.001  | 1.76 (1.42-2.17) | <0.001 |
| 4000 +                                                     | 1.02 (0.89-1.18) | 0.751   | 0.96 (0.82-1.12) | 0.583  |
| <b>Admission of infant to a special care unit</b>          | 1.62 (1.44-1.82) | <0.001  | 1.43 (1.24-1.64) | <0.001 |
| <b>Year of birth</b>                                       |                  |         |                  |        |
| 2010 (reference)                                           | 1.00             |         | 1.00             |        |
| 2011                                                       | 0.90 (0.74-1.09) | 0.307   | 0.89 (0.72-1.09) | 0.248  |
| 2012                                                       | 0.93 (0.77-1.12) | 0.467   | 0.90 (0.74-1.09) | 0.291  |
| 2013                                                       | 0.86 (0.72-1.04) | 0.122   | 0.79 (0.64-0.96) | 0.018  |
| 2014                                                       | 0.91 (0.76-1.09) | 0.324   | 0.82 (0.67-0.99) | 0.047  |
| 2015                                                       | 0.88 (0.73-1.06) | 0.188   | 0.74 (0.60-0.91) | 0.004  |

|      |                  |       |                  |        |
|------|------------------|-------|------------------|--------|
| 2016 | 0.78 (0.64-0.94) | 0.010 | 0.63 (0.51-0.78) | <0.001 |
| 2017 | 0.73 (0.61-0.89) | 0.002 | 0.61 (0.50-0.75) | <0.001 |
